# Supplementary material for: An integrated process for the production of 2,5-dihydroxymethylfuran and its polymer from fructose
Source: Royal Society of Chemistry journal article supplement (doi:10.1039/c7gc03597g), 2018-01-01
Supplement: c7gc03597g1.pdf [file c7gc03597g1.pdf]

Supplementary Materials for  
**An integrated process for the production of 2, 5-  
dihydroxymethylfuran and its polymer from fructose**

Pravin P. Upare<sup>1</sup>, Young Kyu Hwang<sup>1,2</sup>, Dong Won Hwang<sup>1,2\*</sup>

<sup>1</sup>Green Carbon Catalysis Research Group, Korea Research Institute of Chemical Technology (KRICT), 141 Gajeongro, Yuseong, Daejeon 305–600, Republic of Korea.

<sup>2</sup>Department of Green Chemistry & Biotechnology, University of Science and Technology (UST), 113 Gwahangno, Yuseong, Daejeon 305–333, Republic of Korea.

\*Correspondence to: [dwhwang@kRICT.re.kr](mailto:dwhwang@kRICT.re.kr)

Figs. S1 to S5

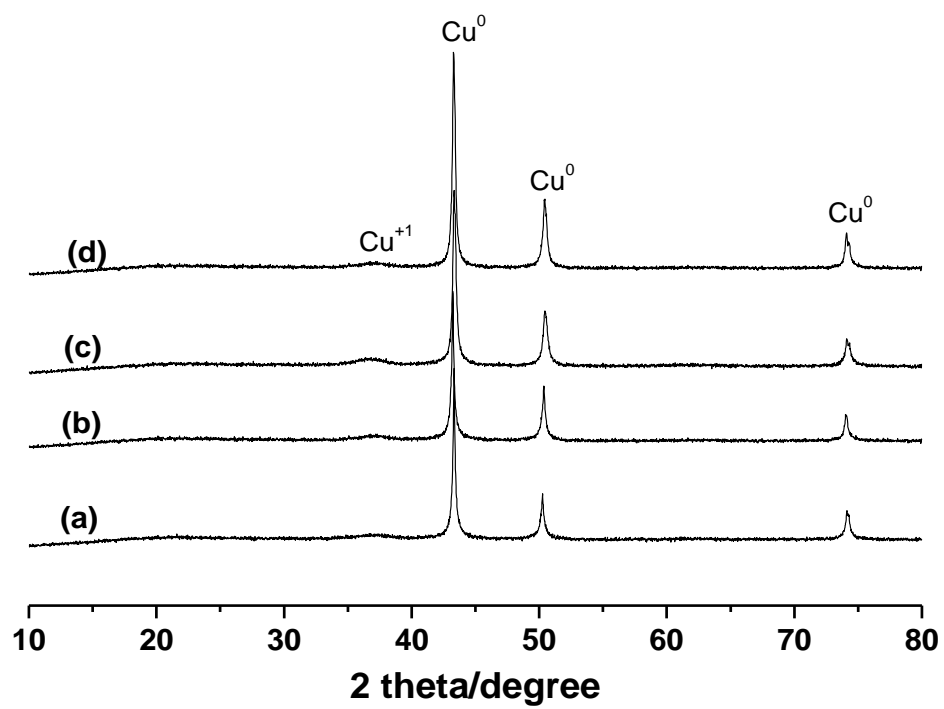

**Figure S1.** XRD of catalysts, a) Cu(40)-SiO<sub>2</sub>, b) Cu(50)-SiO<sub>2</sub>, c) Cu(60)-SiO<sub>2</sub>, and d) Cu(80)-SiO<sub>2</sub>.

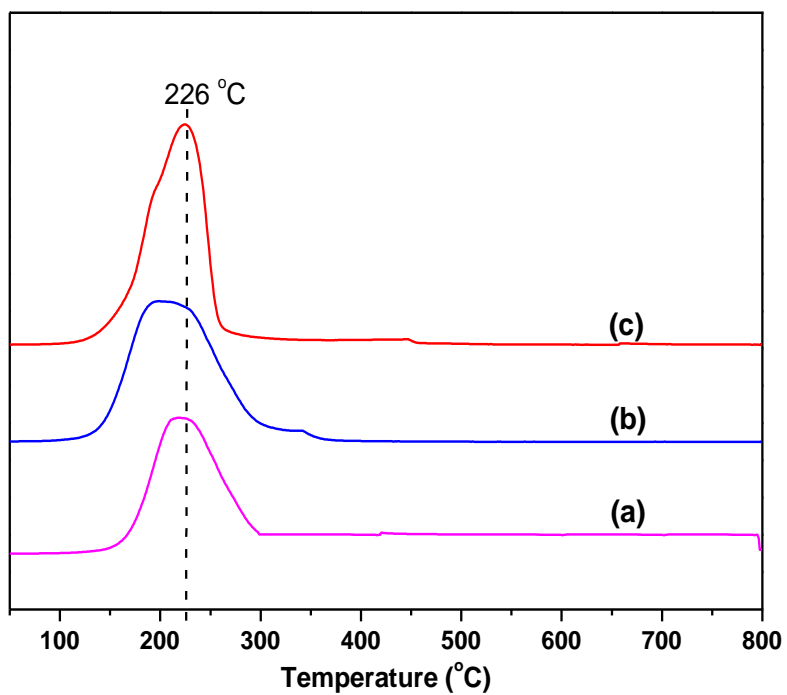

**Figure S2** H<sub>2</sub>-TPR of calcined catalysts, a) Cu(40)-SiO<sub>2</sub>, b) Cu(50)-SiO<sub>2</sub>, and c) Cu(60)-SiO<sub>2</sub>

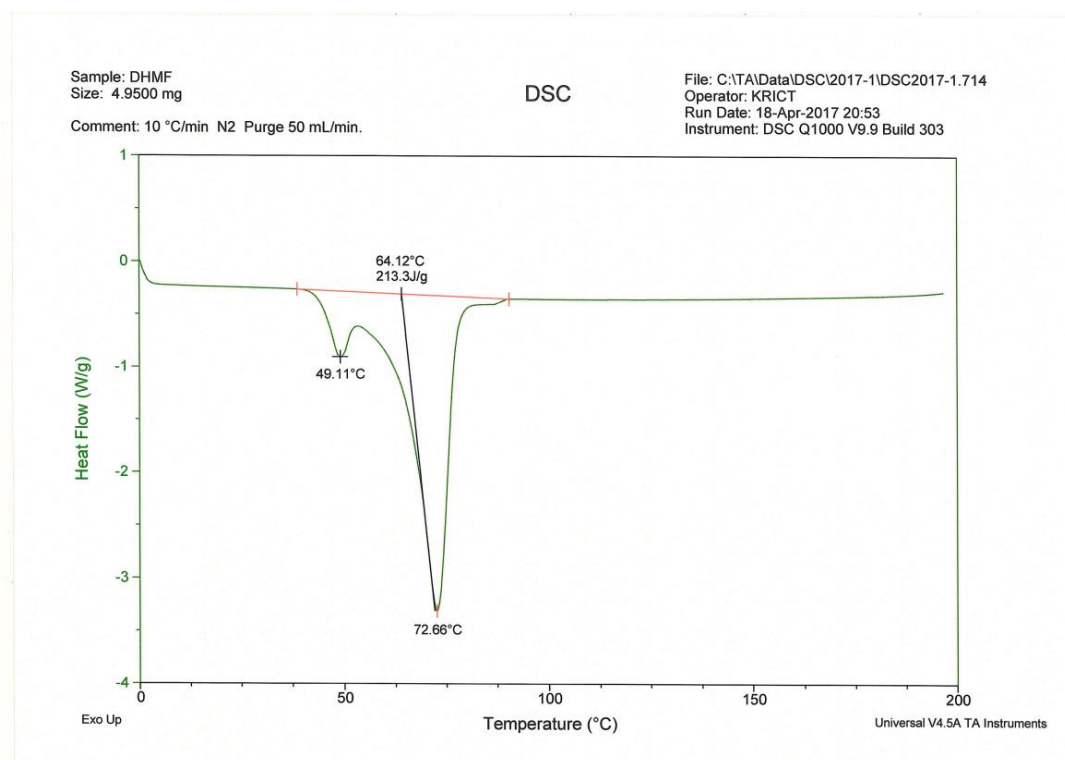

(A) DHMF

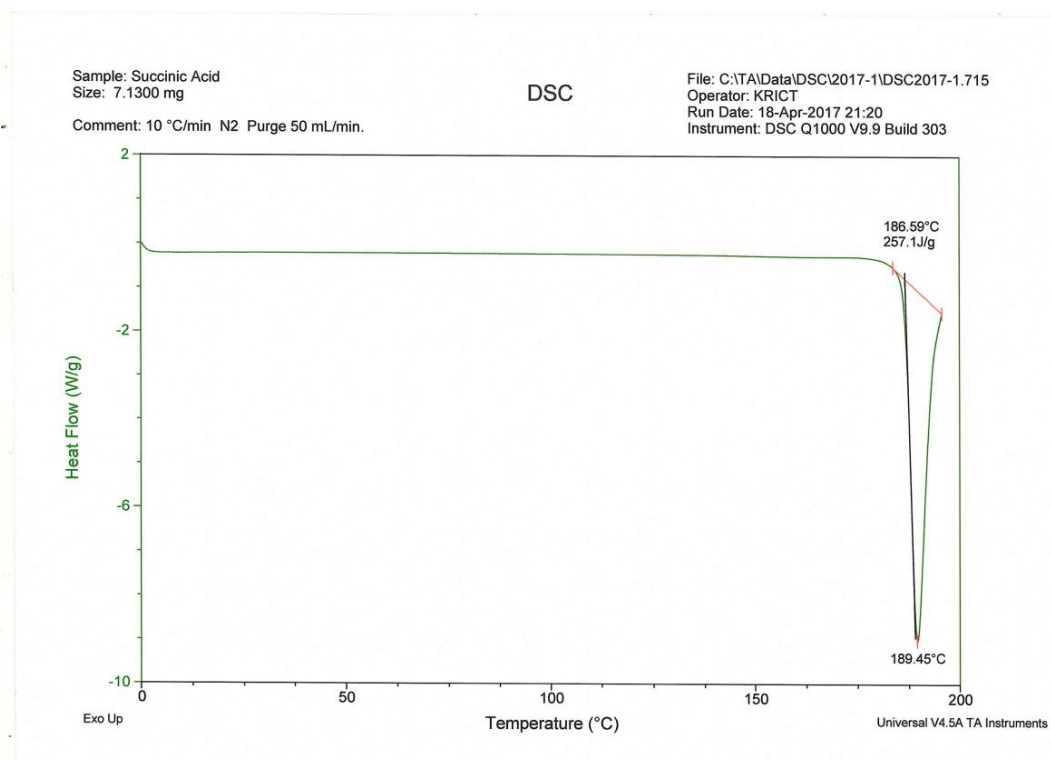

(B) succinic acid

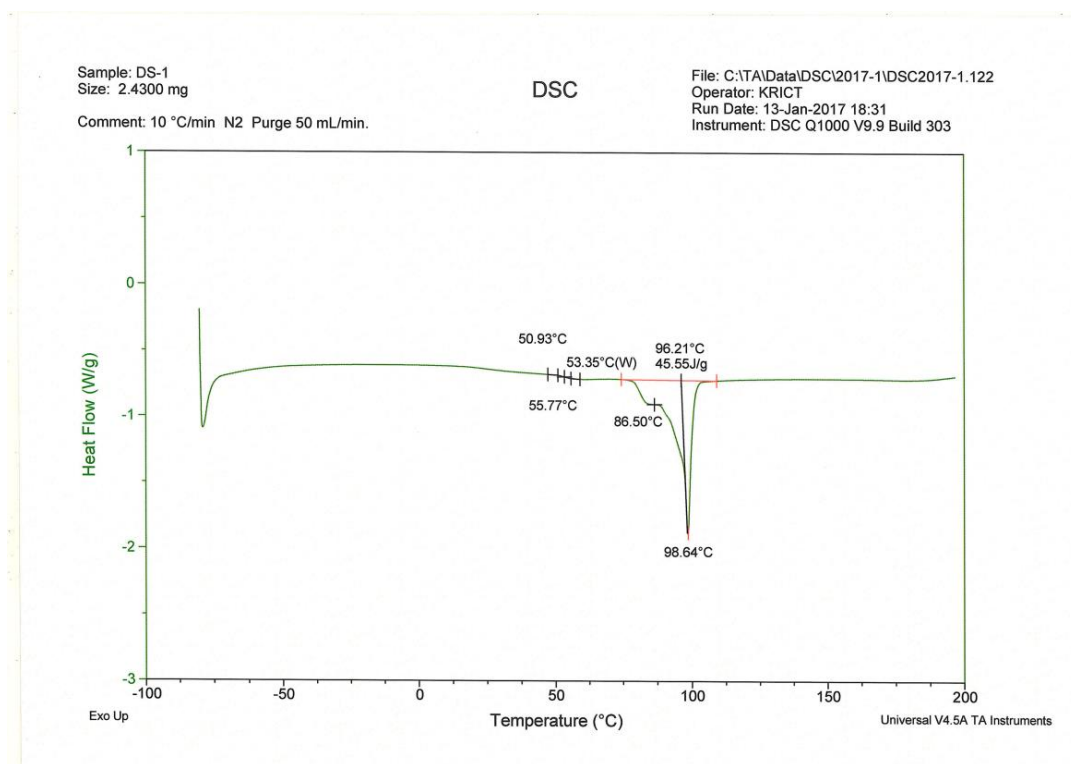

**(C) PFS polymer**

**Figure S3.** DSC profile of A) DHMF, B) succinic acid, and C) poly (2, 5-furandimethylene succinate)

| SAMPLE INFORMATION                      |               |                     |            |
|-----------------------------------------|---------------|---------------------|------------|
| Sample Name:                            | DS-1          | Acquired By:        | System     |
| Sample Type:                            | Broad Unknown | Sample Set Name     | 20160907   |
| Vial:                                   | 2             | Acq. Method Set:    | THF_1      |
| Injection #:                            | 2             | Processing Method:  | THF 27 00B |
| Injection Volume:                       | 100.00 ul     | Channel Name:       | 410        |
| Run Time:                               | 40.0 Minutes  | Proc. Chnl. Descr.: | 410        |
| Date Acquired: 9/7/2016 5:17:38 PM KST  |               |                     |            |
| Date Processed: 9/8/2016 2:56:44 AM KST |               |                     |            |

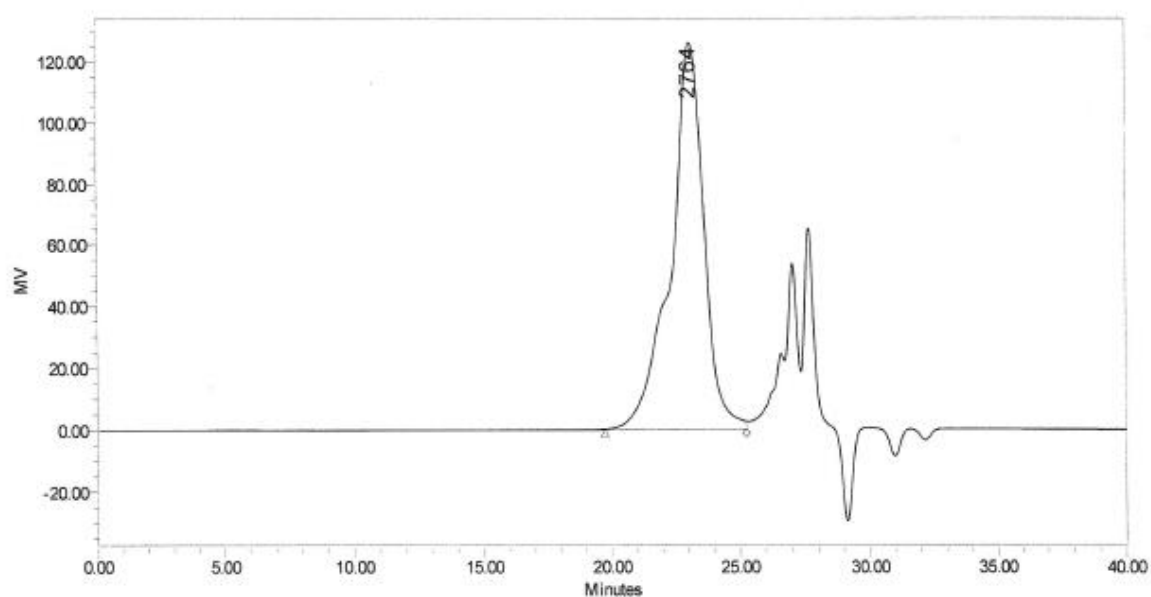

#### GPC Results

| Dist Name | Mn   | Mw   | MP   | Mz   | Mz+1  | Polydispersity |
|-----------|------|------|------|------|-------|----------------|
| 1         | 2719 | 4046 | 2764 | 6723 | 11444 | 1.488348       |

**Figure S4.** GPC analysis of poly-(2, 5-furandimethylene succinate)

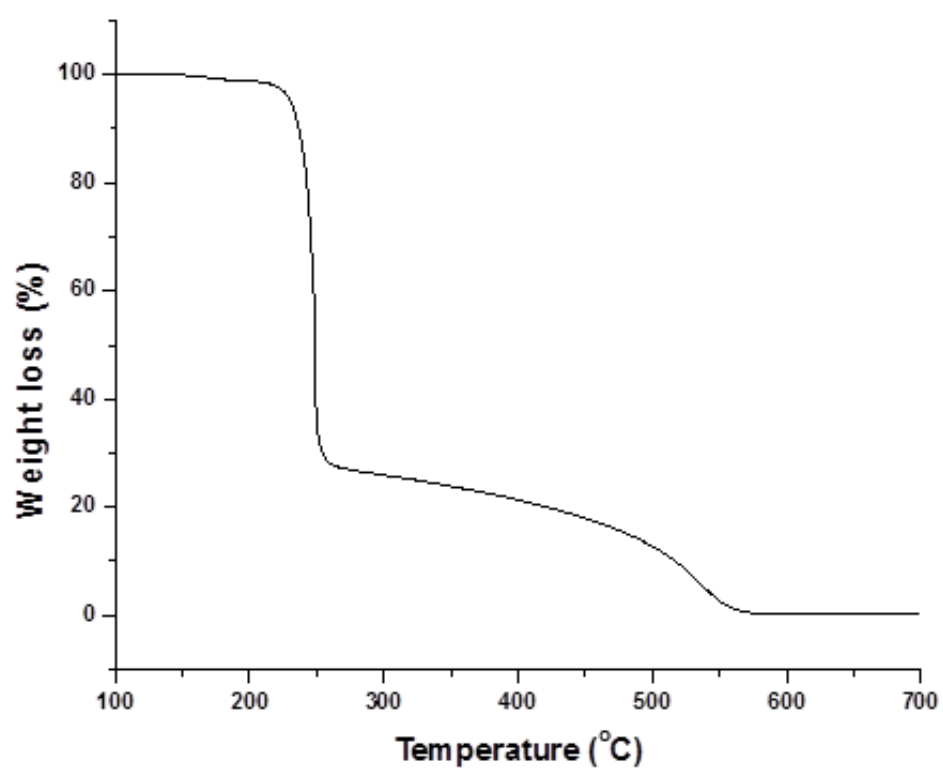

**Figure S5.** TGA of poly-(2, 5-furandimethylene succinate)
